# Supplementary material
Source: PubMed Central journal article supplement (PMC2879338)

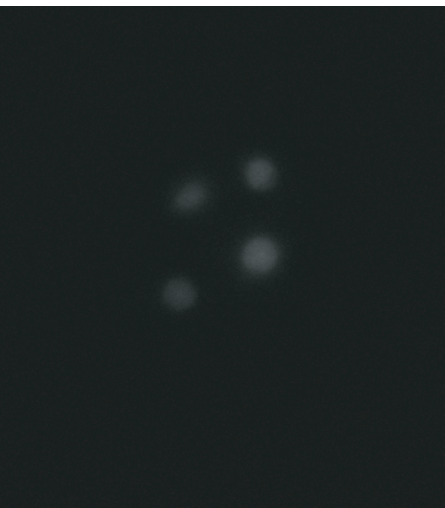

Ddc1-GFP-LacI, no array

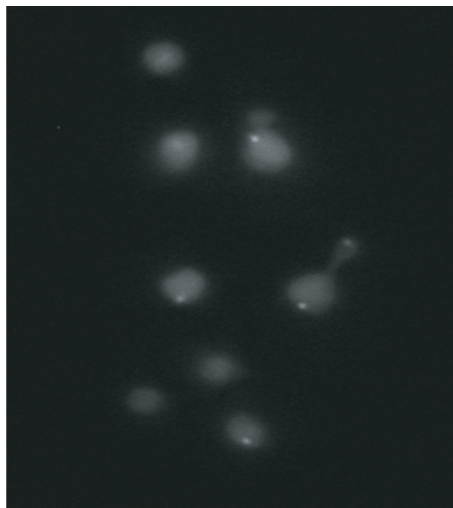

Ddc1-GFP-LacI + array

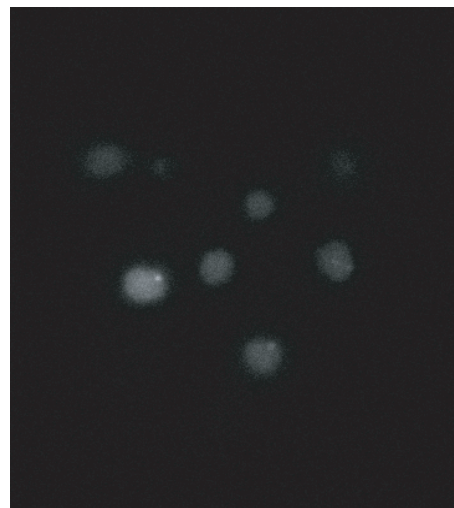

Ddc1-GFP-LacI + Zeocin

# Supplementary Figure 2

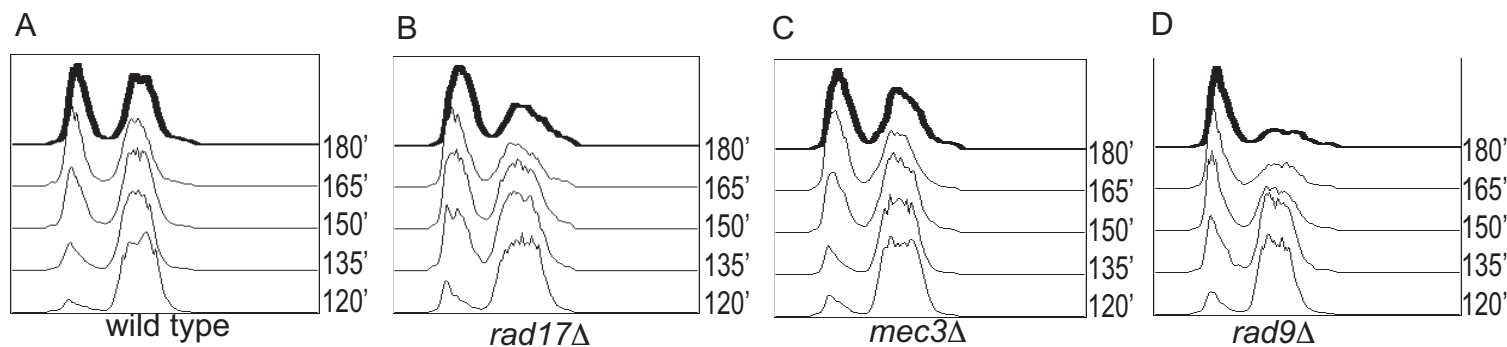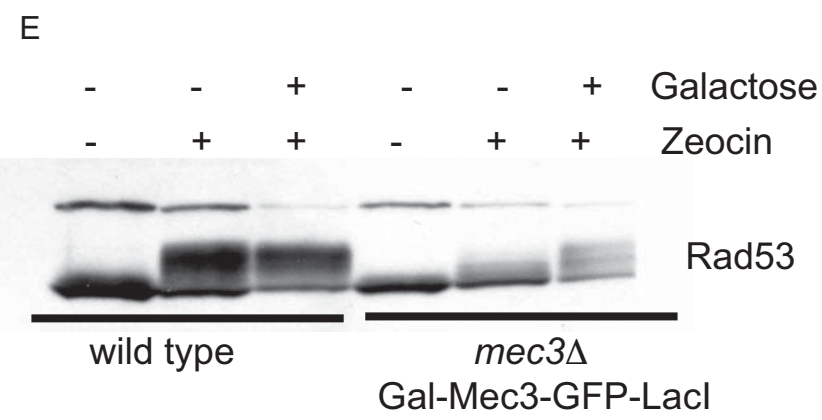

Supplement: NIHMS137304-supplement-supplemental_figures.pdf [file NIHMS137304-supplement-supplemental_figures.pdf]
